# Supplementary material for: Stretchable Gold Nanomembrane Electrode with Ionic Hydrogel Skin-Adhesive Properties
Source: MDPI journal article supplement (doi:10.3390/polym15183852), 2023-09-21
Supplement: s1 [file s1]

## **Supplementary Information**

### **Stretchable gold nanomembrane electrode with ionic hydrogel skin-adhesive properties**

**This PDF file includes:**

Supplementary Figure. 1

Supplementary Figure. 2

Supplementary Figure. 3

Supplementary Figure. 4

Supplementary Figure. 5

## Supplementary Figure

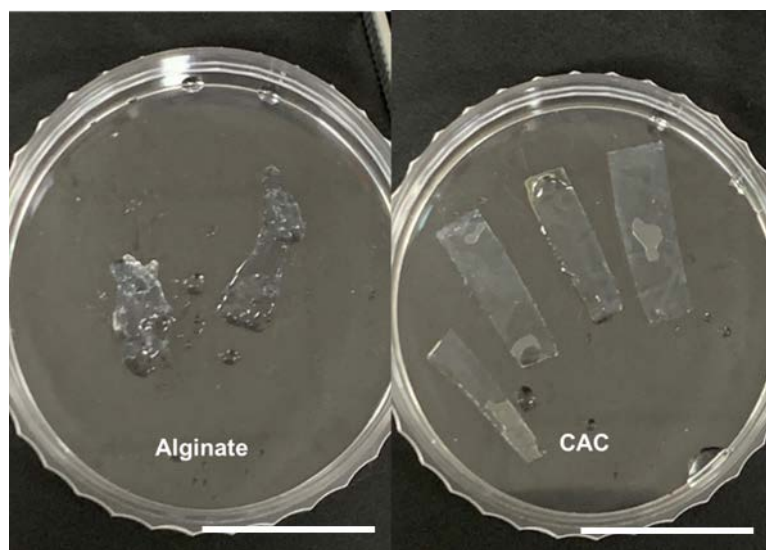

**Figure S1.** Optical image of bare alginate and CAC hydrogels after 1 min swelling in PBS at room temperature (Scale bar: 25 mm).

## Supplementary Figure

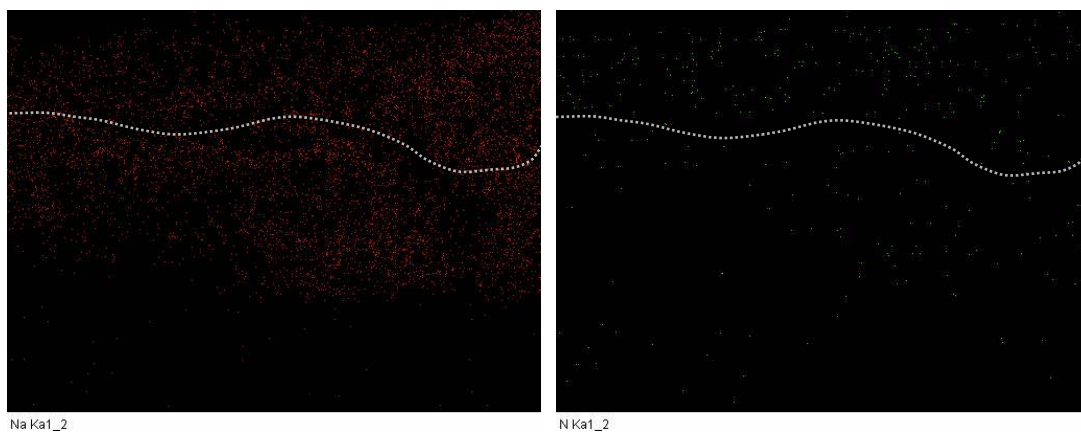

**Figure S2.** EDS analysis of chitosan-alginate hydrogel layer.

### Supplementary Figure

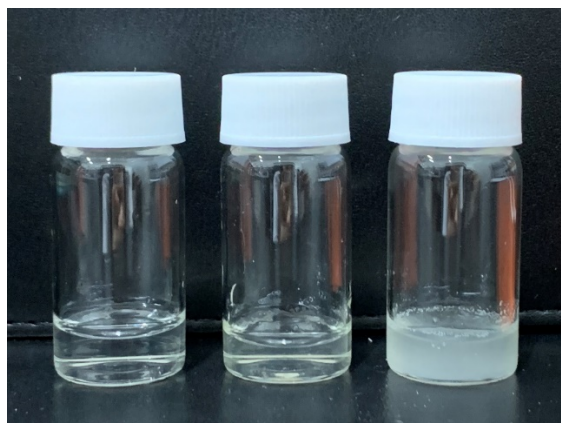

**Figure S3.** Image of chitosan in different weight percentages (1 wt%, 2 wt%, 3 wt% from left to right)

## Supplementary Figure

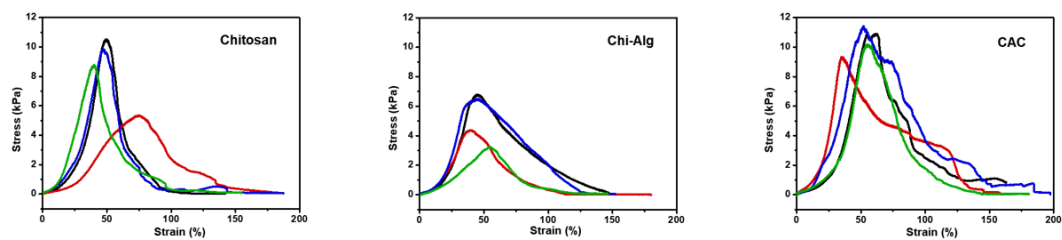

**Figure S4.** Strain-stress curves from 4 different samples of chitosan, Chi-Alg and CAC hydrogel.

## Supplementary Figure

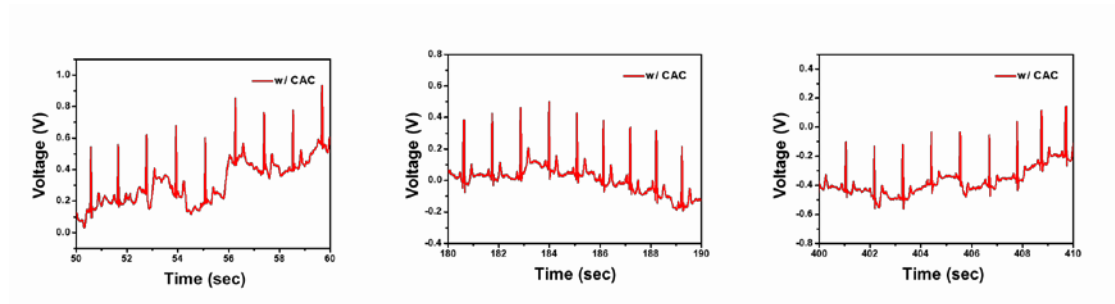

**Figure S5.** ECG signals measured on multiple time axes.

## References

- [1] Li, Y.; Tanaka, T. Phase transitions of gels, *Annual Review of Materials Science*, 1992, 22, 243-277.
- [2] Khan, Y. A.; Ozaltin, K.; Bernal-Ballen, A.; Martino, A. D. Chitosan-alginate hydrogels for simultaneous and sustained releases of ciprofloxacin, amoxicillin and vancomycin for combination therapy, *Journal of Drug Delivery Science and Technology*, **2021**, 61, 102126.
- [3] Jung, E. C.; Maibach, H. I. Animal models for percutaneous absorption, *Topical Drug Bioavailability, Bioequivalence, and Penetration*, **2014**, 21-40.
